# Supplementary material
Source: MDPI journal article supplement (https://www.mdpi.com/2073-4433/9/4/144)
Supplement: s1 [file s1]

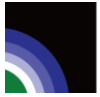

# Supplementary Information

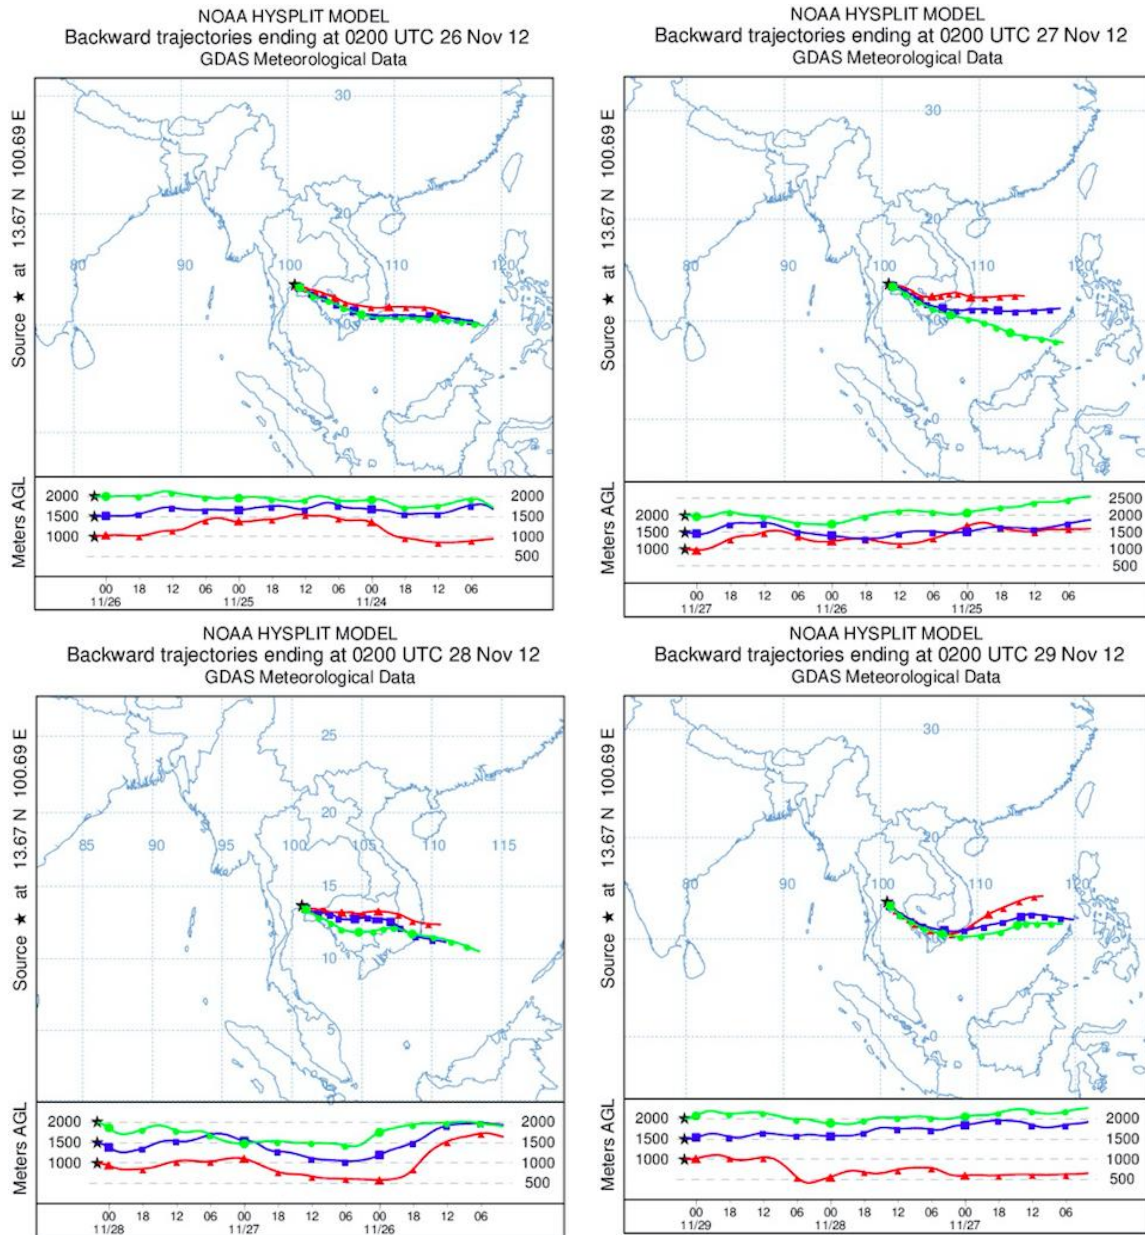

Figure. S1. Back-trajectory analysis from 26 November to 29 November 2012.

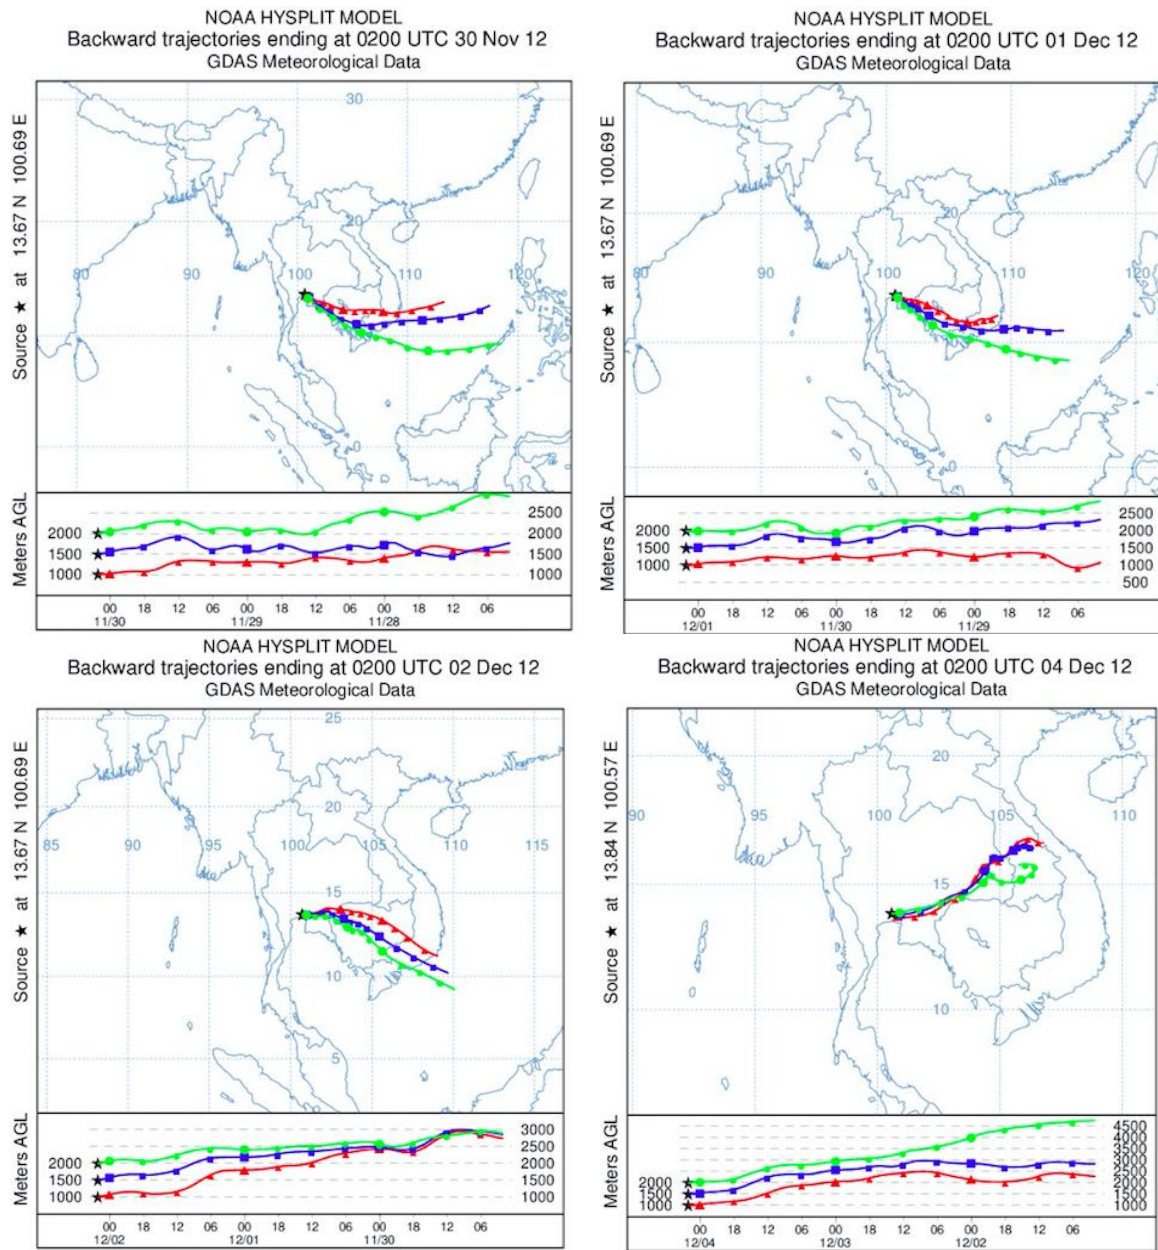

Figure S2. Back-trajectory analysis from 30 November to 4 December 2012.

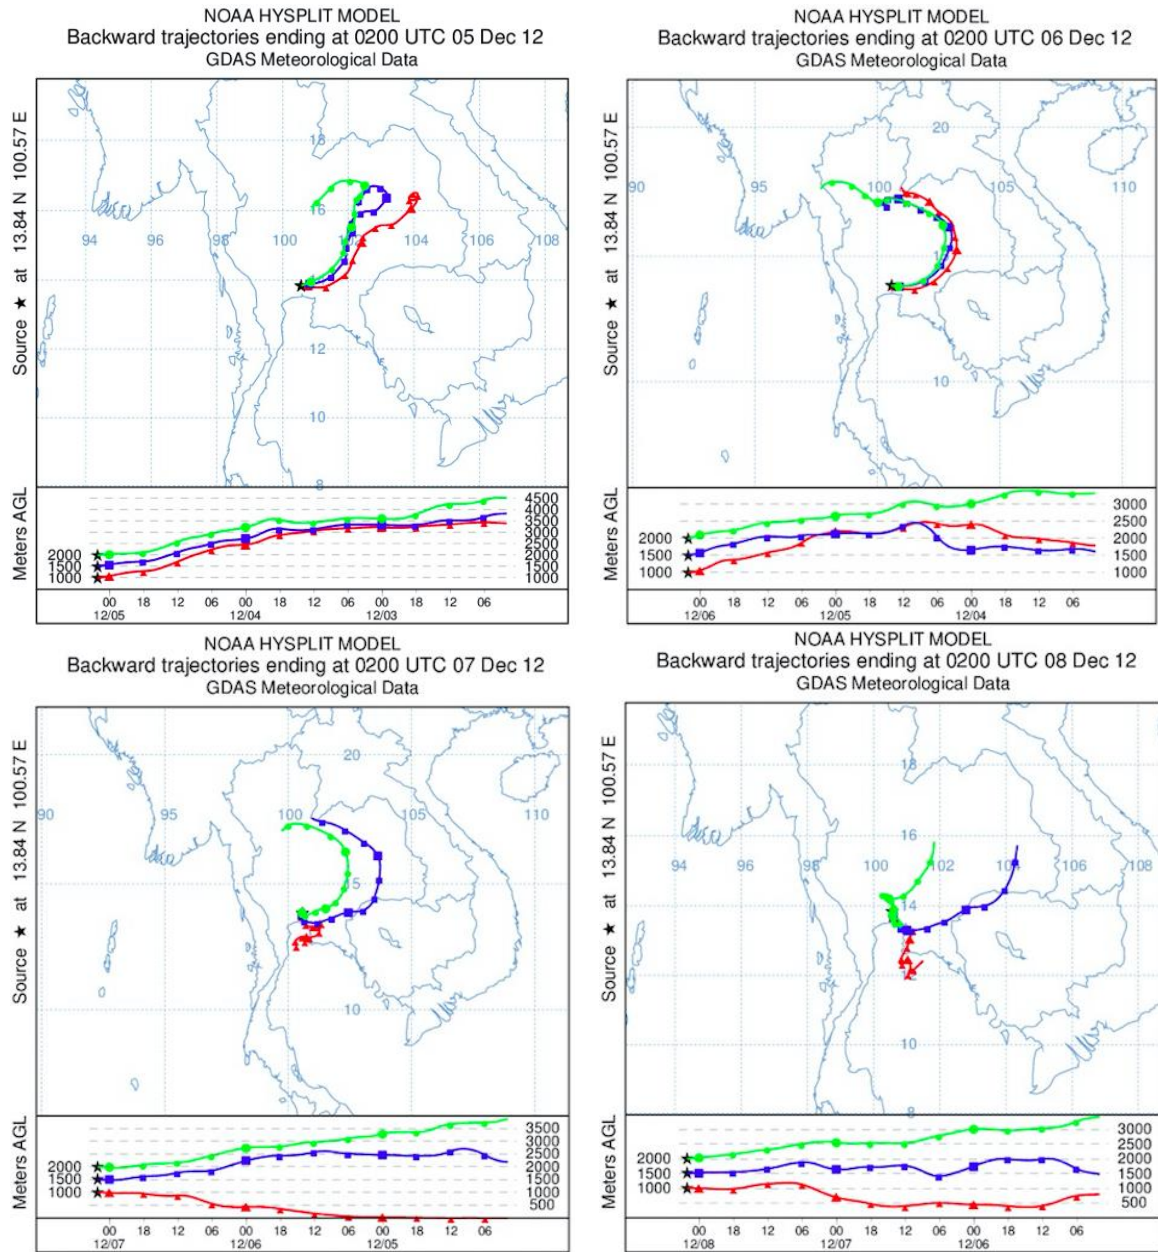

Figure S3. Back-trajectory analysis from 5 December 8 to December 2012.



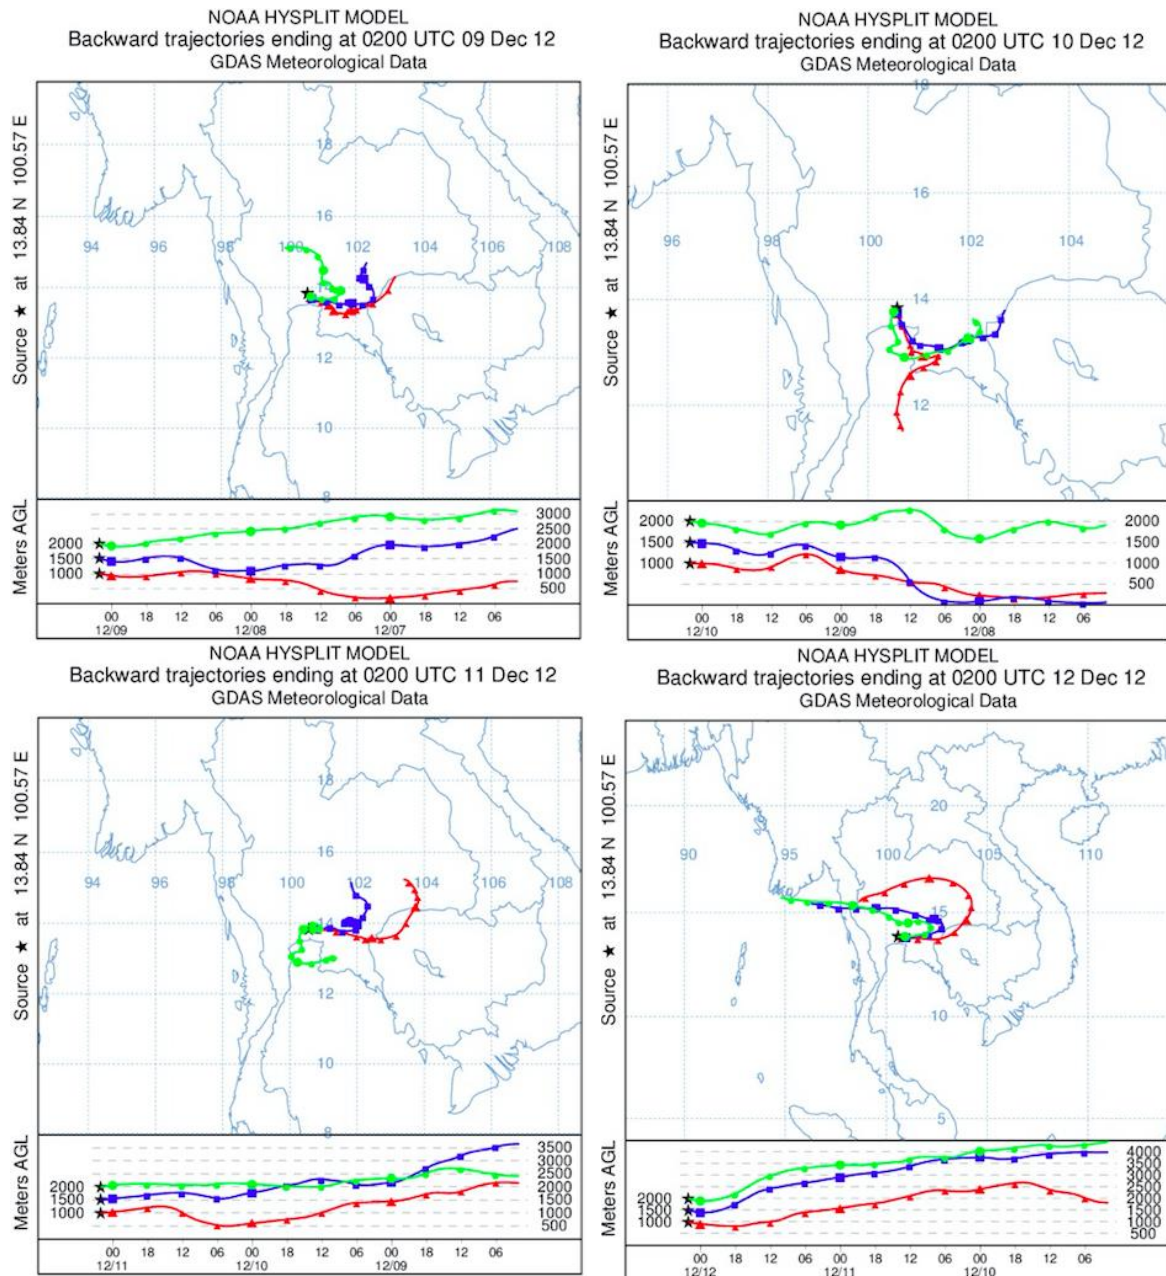

Figure S4. Back-trajectory analysis from 9 December to 12 December 2012.

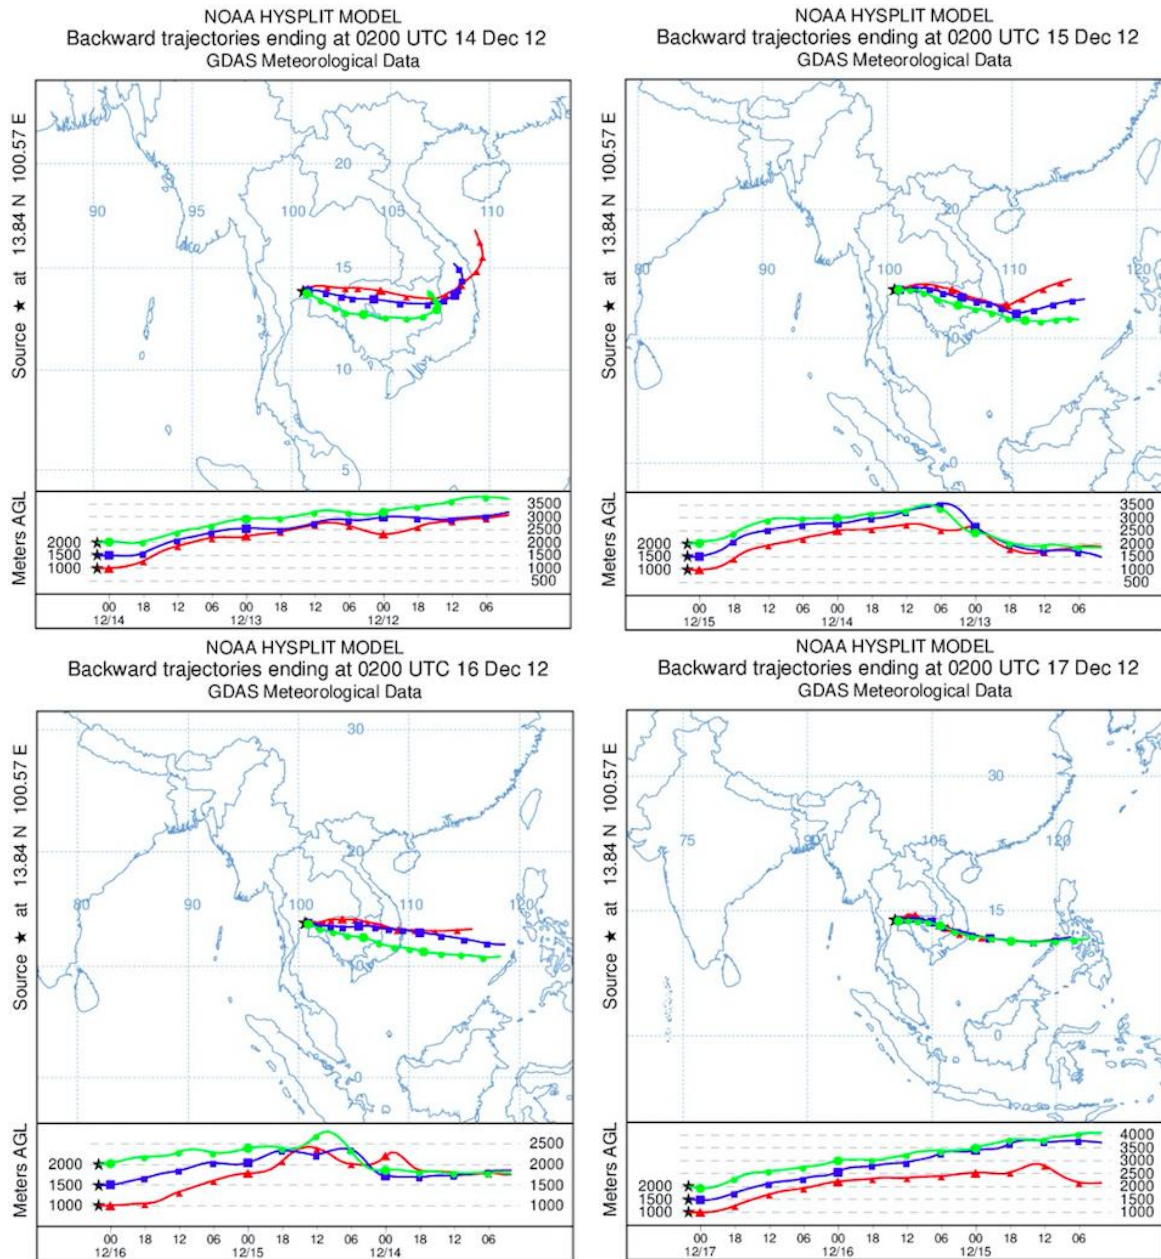

Figure S5. Back-trajectory analysis from 14 December to 17 December 2012.

**Table S1.** Analytical performance obtained by ICP-MS.

| Element | Analytical Mode <sup>a</sup> | Mass/Charge | Detection Limit <sup>b</sup> | Unit               | Standard Solution |
|---------|------------------------------|-------------|------------------------------|--------------------|-------------------|
| Li      | NG                           | 7           | 4.72                         | ng L <sup>-1</sup> | XSTC-331          |
| Be      | NG                           | 9           | 2.70                         | ng L <sup>-1</sup> | XSTC-331          |
| Na      | H2                           | 23          | 1.30                         | µg L <sup>-1</sup> | XSTC-331          |
| Mg      | He                           | 24          | 0.427                        | µg L <sup>-1</sup> | XSTC-331          |
| Al      | He                           | 27          | 0.117                        | µg L <sup>-1</sup> | XSTC-331          |
| K       | H2                           | 39          | 1.02                         | µg L <sup>-1</sup> | XSTC-331          |
| Ca      | H2                           | 40          | 0.601                        | µg L <sup>-1</sup> | XSTC-331          |
| Sc      | He                           | 45          | 1.35                         | ng L <sup>-1</sup> | XSTC-1            |
| V       | He                           | 51          | 0.927                        | ng L <sup>-1</sup> | XSTC-331          |
| Cr      | He                           | 53          | 5.28                         | ng L <sup>-1</sup> | XSTC-331          |
| Mn      | He                           | 55          | 9.11                         | ng L <sup>-1</sup> | XSTC-331          |
| Fe      | He                           | 56          | 73.9                         | ng L <sup>-1</sup> | XSTC-331          |
| Co      | He                           | 59          | 0.937                        | ng L <sup>-1</sup> | XSTC-331          |
| Ni      | He                           | 60          | 10.6                         | ng L <sup>-1</sup> | XSTC-331          |
| Cu      | He                           | 63          | 15.0                         | ng L <sup>-1</sup> | XSTC-331          |
| Zn      | He                           | 66          | 40.0                         | ng L <sup>-1</sup> | XSTC-331          |
| As      | He                           | 75          | 2.66                         | ng L <sup>-1</sup> | XSTC-331          |
| Se      | H2                           | 78          | 11.5                         | ng L <sup>-1</sup> | XSTC-331          |
| Rb      | He                           | 85          | 4.13                         | ng L <sup>-1</sup> | XSTC-331          |
| Sr      | He                           | 88          | 1.96                         | ng L <sup>-1</sup> | XSTC-331          |
| Y       | He                           | 89          | 2.50                         | ng L <sup>-1</sup> | XSTC-1            |
| Zr      | He                           | 90          | 0.171                        | ng L <sup>-1</sup> | XSTC-8            |
| Mo      | He                           | 95          | 1.75                         | ng L <sup>-1</sup> | XSTC-8            |
| Cd      | He                           | 111         | 2.25                         | ng L <sup>-1</sup> | XSTC-331          |
| Sn      | He                           | 118         | 1.53                         | ng L <sup>-1</sup> | XSTC-7            |
| Sb      | He                           | 121         | 0.494                        | ng L <sup>-1</sup> | XSTC-7            |
| Cs      | He                           | 133         | 0.922                        | ng L <sup>-1</sup> | XSTC-331          |
| Ba      | He                           | 137         | 2.13                         | ng L <sup>-1</sup> | XSTC-331          |
| Tl      | He                           | 205         | 0.657                        | ng L <sup>-1</sup> | XSTC-331          |
| Pb      | He                           | 208         | 1.44                         | ng L <sup>-1</sup> | XSTC-331          |
| Bi      | He                           | 209         | 10.5                         | ng L <sup>-1</sup> | XSTC-331          |

<sup>a</sup> Determination was performed under three different analytical modes. NG = non-gas mode, which was performed without collision/reaction cell system.

<sup>b</sup> Values were defined as three times the standard deviation of ten calibration blank analyses. H<sub>2</sub> = reaction mode using hydrogen gas. He = collision mode using helium gas.
